# Supplementary material
Source: PubMed Central journal article supplement (PMC555507)
Supplement: pnas_102_12_4560__1.pdf [file pnas_102_12_4560__1.pdf]

ppH77(1a) 132 DLMGYIPLVGAPLGGGAARALAHGVRVLEEDGVNYATGNLPGCFSSIFLLALLSCLTVPASAYQVRNSSGLYHVTNDPCNSSIVYEAADAILHTPGCVPCVR-EGNASRCWVAVTPTVATRDGKLP 255  
 ppJ6CF(2a) 132 .....V.....V.....F.....S.....I.T.V..AE.K.I.TG.M.....T.D..TWQLQA.V.V.....EK-V...Q..IP.S.N..VQRPGAL. 255  
 ppS52(3a) 132 .....V.....V.....A.....I.F.....S.....F..VH..ASLEW..T...VL...S.....D.V.....Q-DD.T.T..TP.....V.YVGAT. 255  
 ppED43(4a) 132 .....V.V.....A.....I.....S.....VNY.V.I.....DHH...L.....Q.....L.....APYIGA.L 255  
 ppSA13(5a) 132 .....G.V.V.....S.....I.....T.VPY.A.V.....E.L.A.....-Q.V.....QI...LSAPSLGAV. 255  
 ppHK(6a) 132 .....V.....V.A.....AI..I.....S.....T...LTYG.....L.....L.DAM...L...L...VNN.Q.I..H..S..L.IPNAST.A 256  
  
 ppH77(1a) 256 TQLRRHIDLVLGSATLCSALYVGLCGSVFLVGQLFTFSPRRHWTQSCNCSIYPGHITGHRMAWDMMNWSPTAALVVAQLLRIPQAIMDMIAGAHWGLAGIAYFSMVGWAKVLVLLLFAG 380  
 ppJ6CF(2a) 256 QG..T...MV.M.....G.M.AA.M.IV..QH..FV.D.....T.....TMIL.YAM.V.EV.I.I.S.....MF.L....Q.A...V.I...A.. 380  
 ppS52(3a) 256 ASI.S.V....A.....M..A.....A...R...Q.V.T...L...VS.....AVGM...HI..L..TLF.IL.....I...L..Y..Q.....AI.MIM.S. 380  
 ppED43(4a) 256 ES..S.V..M..A..V..G..I....GL....M.S.R.....D.....T.....TT..L..VM...TTLV.LLS.G....V.V....QA....IL..F.... 380  
 ppSA13(5a) 256 AP...AV.Y.A.G.A.....A..A.....M..Y....NVV.D....S.....T...M.....VVI.I.....FAA..YASAA....VL..F.... 380  
 ppHK(6a) 257 .GF...V...A.A.VV..S..I....L..A.....Q.....V.D....T..V.....TT..LSSI..V.EICASV.F.G...I.LAV...G.A...L...A..F.... 381  
  
 ppH77(1a) 381 VDAETHVTGGSAGHTTAGLVGLLTPGAKQNIQLINTNGSWHINSTALNCNDSLTTGWLAGLFYRHKFNSSGCPERLASCRRLLTDFAQWGPISYAN-GSG-LDERPYCWHYPPRPGCIVPAKSVC 503  
 ppJ6CF(2a) 381 ..R..TV...AQ..GR.TS.FDM.PR.K...V.....R.....H..FI.S...T.S.....MSA..SIEA.RV...ALQ.EDNVTNPE.M.....Q..V.S..T.. 505  
 ppS52(3a) 381 ....Y.....VA.SAR..TS.FSM...KL..V.....E.IN..FI....Y...T...Q..S...PIIS.R....LTD..-IT.PS.D.....A...V...S... 504  
 ppED43(4a) 381 .....S.AAV.RS...AN.FSS.S...L...S.....R.....N..F..S...T.....S...C.KS.DSYG....LGV..-I..SS.D.....A.....S... 504  
 ppSA13(5a) 381 ...S.RTV...AQGAR..AS.F...PQ..L.....R.....Q..FV...L.Y...T...Q.M...P.AA.D...T...A-V..PS.DK.....R.G... 504  
 ppHK(6a) 382 .E.-.TTI.HQV.R..G..AS.FSI.PR..L.....R.....Q..FITS...AKNV...M.A.KP.A..R...Q.T.KVNI..PS.D.....A...DV.S.RT.. 505  
  
 ppH77(1a) 504 GPVYCFTPSPVVVGTDDRSGAPTYSWGANDTDVFLNNTRPPLGNWFGCTWMNSTGFTKVCGAPPCVI-GGVGNN----TLLCPTDCFRKHPEATYSRCGSGPWITPRCMVDYPYRLWHYPC 623  
 ppJ6CF(2a) 506 .....L...T..E.E...L..S.....S.....S.Y..T...RTRADFNAS---TD.....DT..LK.....L...LI.....V. 627  
 ppS52(3a) 505 .....IK.R...N..E.E...L.ESL...S.R...A.....L.T.....N.Y..E.DPENETD.F.....A...L.....V. 629  
 ppED43(4a) 505 .....HV.V...T..E.E...L..S...H.A...V.....T.....EVNTNN,-----WH.....T..AK.....LI.....F...A. 623  
 ppSA13(5a) 505 .....K.N...E.E..I.L.....T.....V.T.....NL-.PT,----S.K.....D...TK.....L...L.H.....L. 624  
 ppHK(6a) 506 .....KL.I...N..E.E...M.ESL...T.G.....T.....Q.VP.DY.SS-ANE.....Q.....L.....V. 629  
  
 ppH77(1a) 624 YTIFKVRMYVGGVEHRLEAACNWRGERCDLEDRDRSELSPLLLSTTQVQLPCSFHTLTPALSTGLIHHLQNIQVQVYLYGVGSSIASWAIKWEYVLLFLLADARVCSCLWMLLISQAE- 745  
 ppJ6CF(2a) 628 .....I.....T...F...D..N.....Q...H...E.AI...YSD.....L.....FM..LSPALTKYIVR..W.I.....A...LI.LG...A 750  
 ppS52(3a) 630 F.L...F...F...FT.....NI.....QH...H...ELAI...PM.....DMVG..L...F.I.V.....VA..L..M...A 752  
 ppED43(4a) 624 FSV.NI.TF...I...MQ.....V.G.H...V.....T..A..I.....AVV...L.....A.....SA....FMV..V.A 746  
 ppSA13(5a) 625 .....I..L...V.....A.....HT...AI...PT.....T...LS...V...V...I..A.....I.T...I...VC...A 747  
 ppHK(6a) 630 F.LH...F...I...FD.....H...I.M...F...LAI...S.M.....S.VT..VV...I..V..V...I.T...L...TV.A 752
